# Supplementary material
Source: PubMed Central journal article supplement (PMC3909869)

**Supplemental Fig. 1. Evidence for codons under positive selection on salivary gland genes.** Evolutionary fingerprinting of salivary genes displaying approximate sampling distributions of synonymous and nonsynonymous rates. Rate plots are drawn on the log scale with the diagonal line corresponding to neutrality (equal rates). The ellipses reflect a Gaussian-approximated variance in each individual rate estimate, and colored pixels show the density of the posterior sample of the distribution for a given rate. Points above the line correspond to positive selection, and points below the line to negative selection. Plot generated using procedure EVF from datamonkey.org (Pond et al. 2010).

### Evidence for positive selection on salivary gland genes

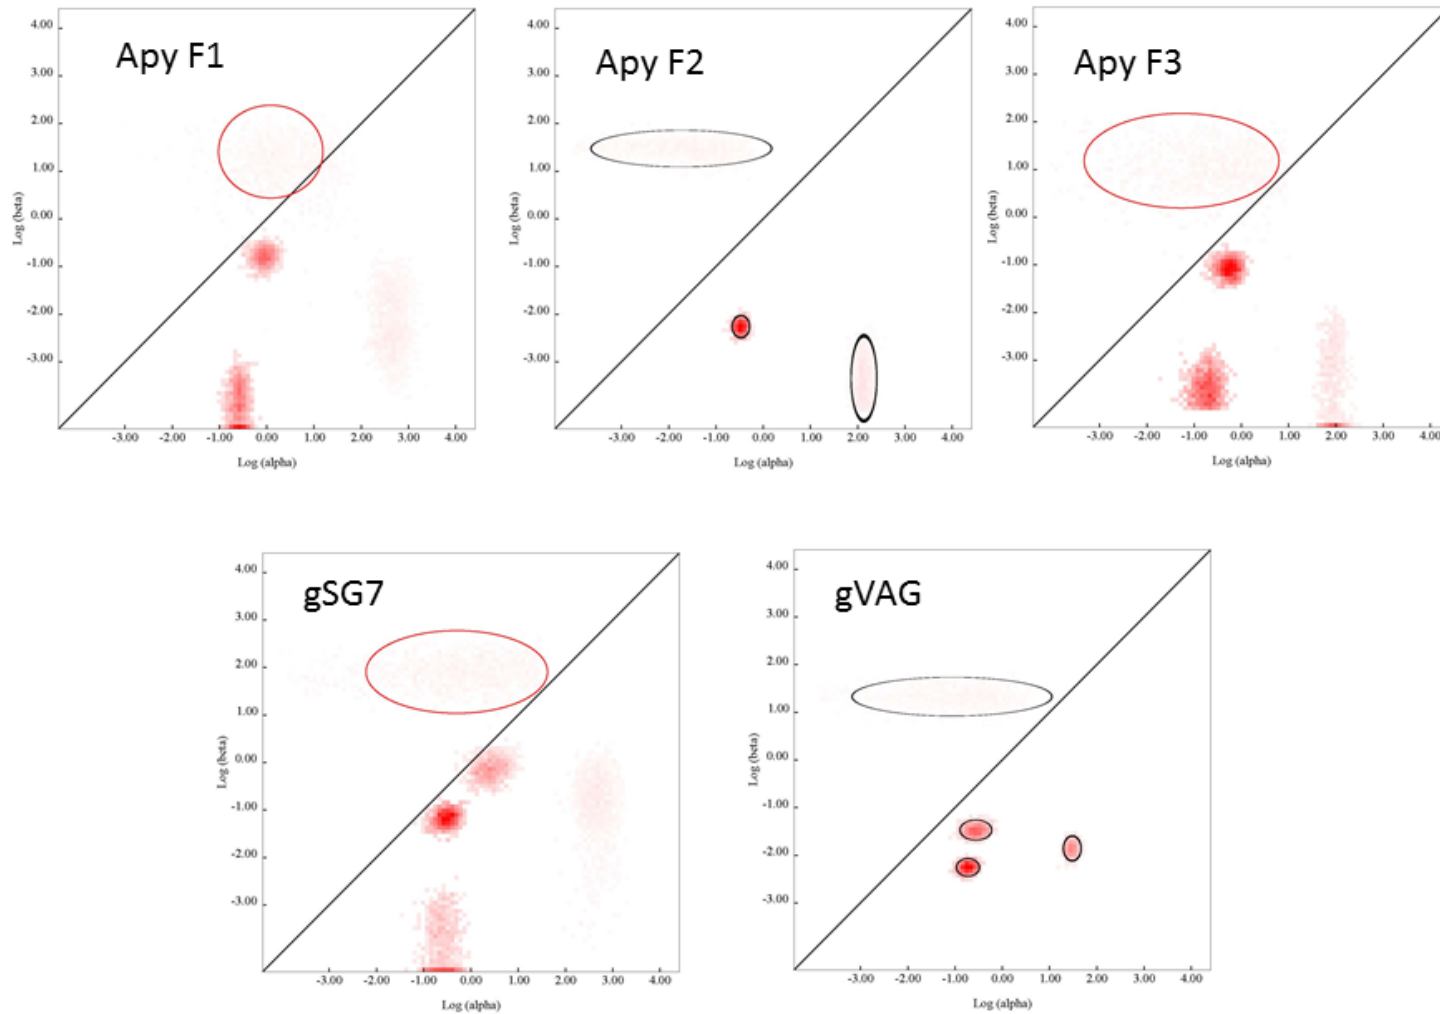

Supplement: NIHMS540018-supplement-Supp_Fig_S1.pdf [file NIHMS540018-supplement-Supp_Fig_S1.pdf]
